# Supplementary material
Source: publisher site journal article supplement (https://www.dovepress.com/get_supplementary_file.php?f=481965.docx)
Supplement: Supplementary file 1 [file get_supplementary_file.php]

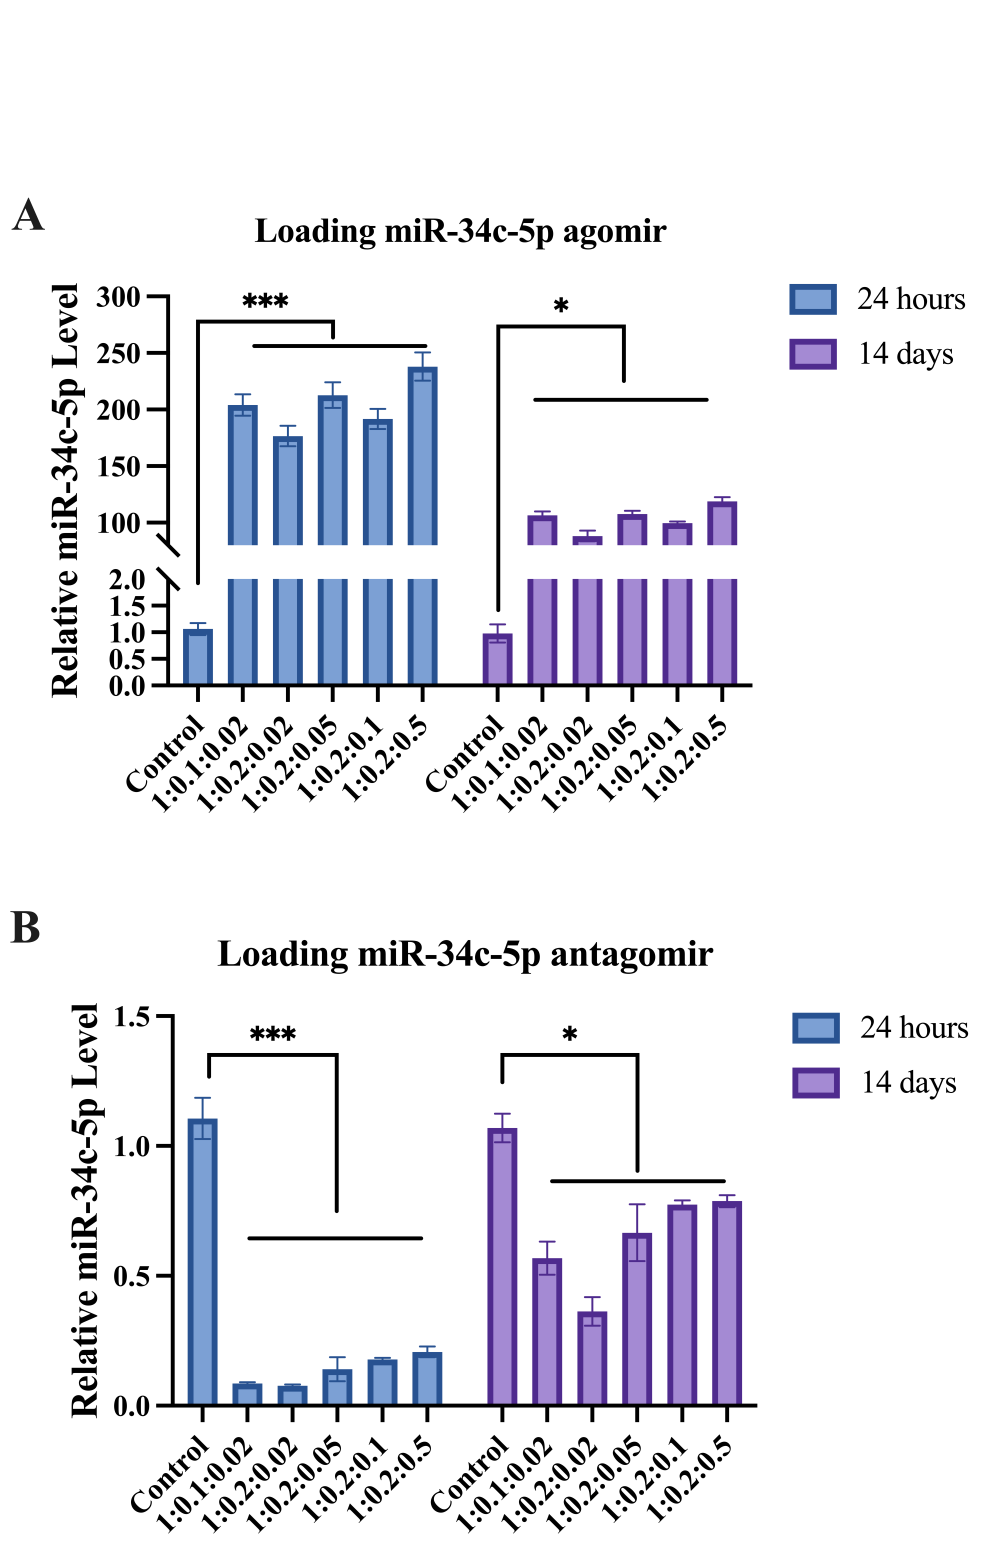


Figure S1 Transfection efficiency of CTS/miR-34c-5p NPs in cells. (A) Relative miR-34c-5p level of CTS/miR-34c-5p Agomir NPs (**P* < 0.05; ****P* < 0.001). (B) Relative miR-34c-5p level of CTS/miR-34c-5p Antagomir NPs (**P* < 0.05; ****P* < 0.001).
